# Supplementary material for: Tuning the solid-state fluorescence of chalcone crystals via molecular coplanarity and J-aggregate formation
Source: Royal Society of Chemistry journal article supplement (doi:10.1039/c6ra27458g), 2017-01-01
Supplement: c6ra27458g1.pdf [file c6ra27458g1.pdf]

## Tuning Solid-State Fluorescence of Chalcone Crystals Via Molecular Coplanarity and J-Aggregates Formation

Fangfang Yu, † Mingliang Wang, †\* Hao Sun, † Yaqi Shan, † Man Du, † Arshad Khan, † Rabia

Usman, † Wei Zhang, † Hongbin Shan, † and Chunxiang Xu †\*

*† School of Chemistry and Chemical Engineering, Southeast University, Nanjing 211189, P. R. China*

*‡ State Key Laboratory of Bioelectronics, Southeast University, Nanjing 210096, P. R. China*

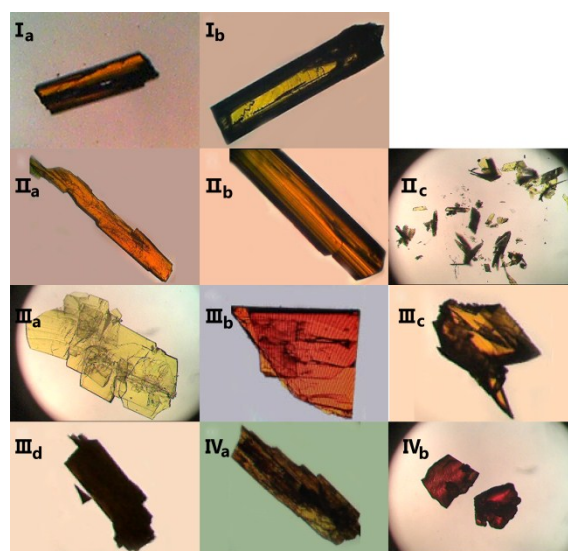

**Fig. 1S** Microscopy graphs of all forms.

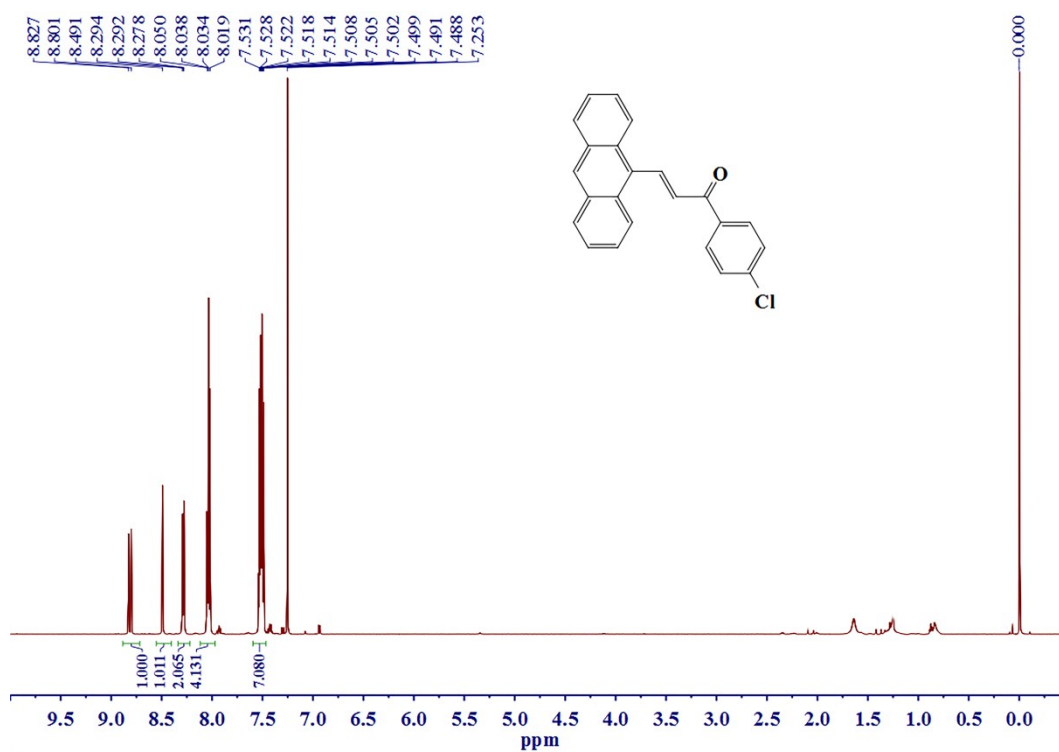

Fig. 2S <sup>1</sup>H NMR spectrum of ACPPPO.

Assignments of each H in the NMR spectrum:  $\delta$  (ppm) 8.81 (Ar-H from anthracene ring, 1H), 8.49 (H of CH from 1-ethylene, 1H), 8.36-8.19 (Ar-H from benzene ring, 2H), 8.04 (Ar-H from anthracene ring, 4H), 7.63-7.46 (the rest Ar-H from anthracene and benzene ring and another H of 1-ethylene, 7H).

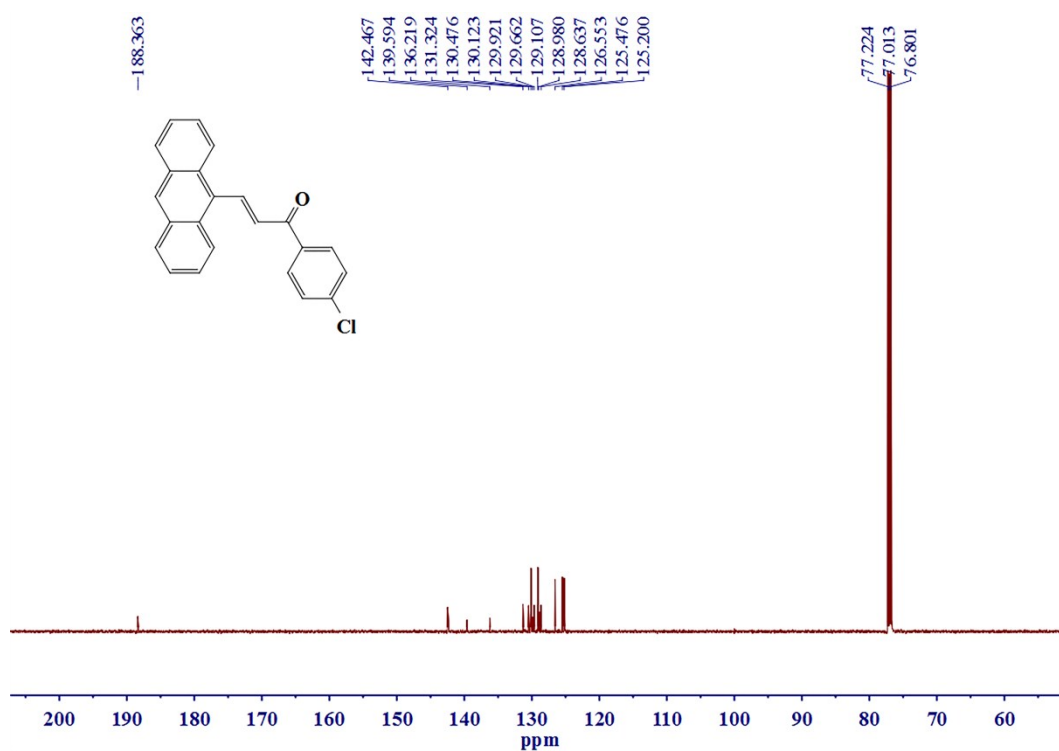

Fig. 3S <sup>13</sup>C NMR spectrum of ACPPPO.

Assignments of C in the NMR spectrum:  $\delta$  (ppm) 188.36 (C=O), 142.47 (C\* = C-CO), 139.59 ((Ph)C-Cl), 136.22 (O=C-C\*(Ph)), 131.32-125.48 (the rest Ar-C from pyrene and benzene rings), 125.20(C=C\*-CO)

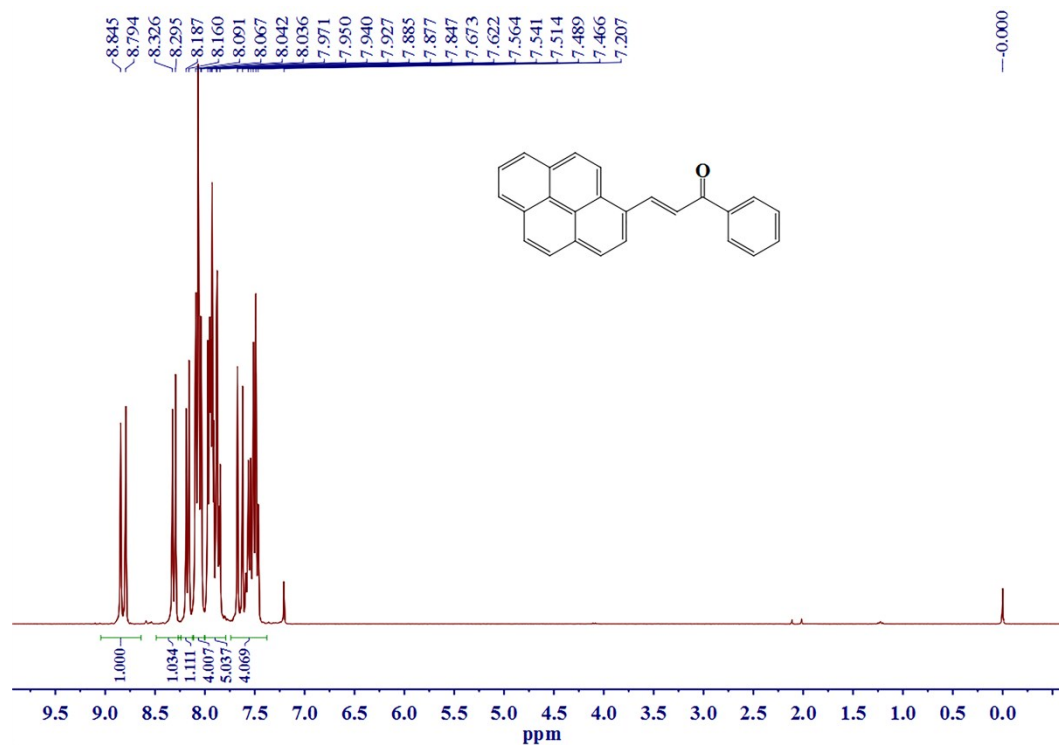

Fig. 4S  $^1\text{H}$  NMR spectrum of PPPO.

Assignments of each H in the NMR spectrum:  $\delta$ (ppm) 8.82 (Ar-H from pyrene ring, 1H), 8.31 (H of CH from 1-ethylene, 1H), 8.17 (Ar-H from pyrene ring, 1H), 8.06 (Ar-H from pyrene ring, 4H), 8.00-7.80 (Ar-H from pyrene and benzene rings, 5H), 7.65 (H of CH from 1-ethylene, 1H), 7.61-7.42 (Ar-H from benzene ring).

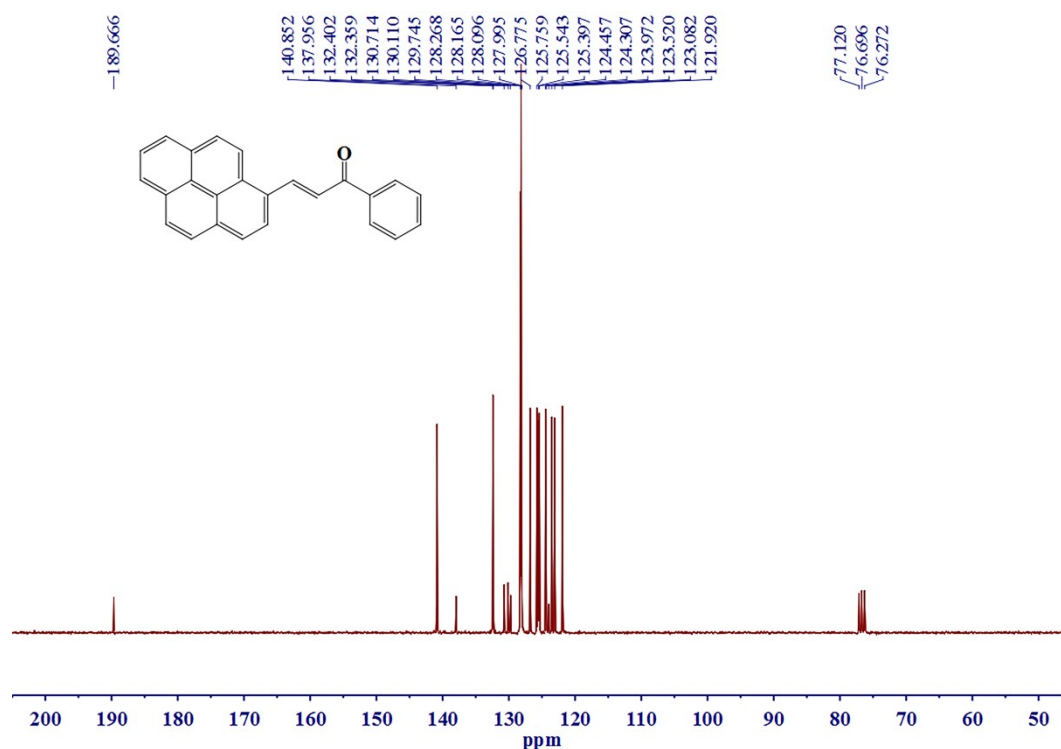

Fig. 55 <sup>13</sup>C NMR spectrum of PPPO.

Assignments of C in the NMR spectrum:  $\delta$  (ppm) 189.67 (C=O), 140.85 (C\*=C-CO), 137.96 (O=C-C\*(Ph)), 132.40-123.97, 123.08, 121.92 (the rest Ar-C from pyrene and benzene rings), 123.52 (C\*=C-CO)

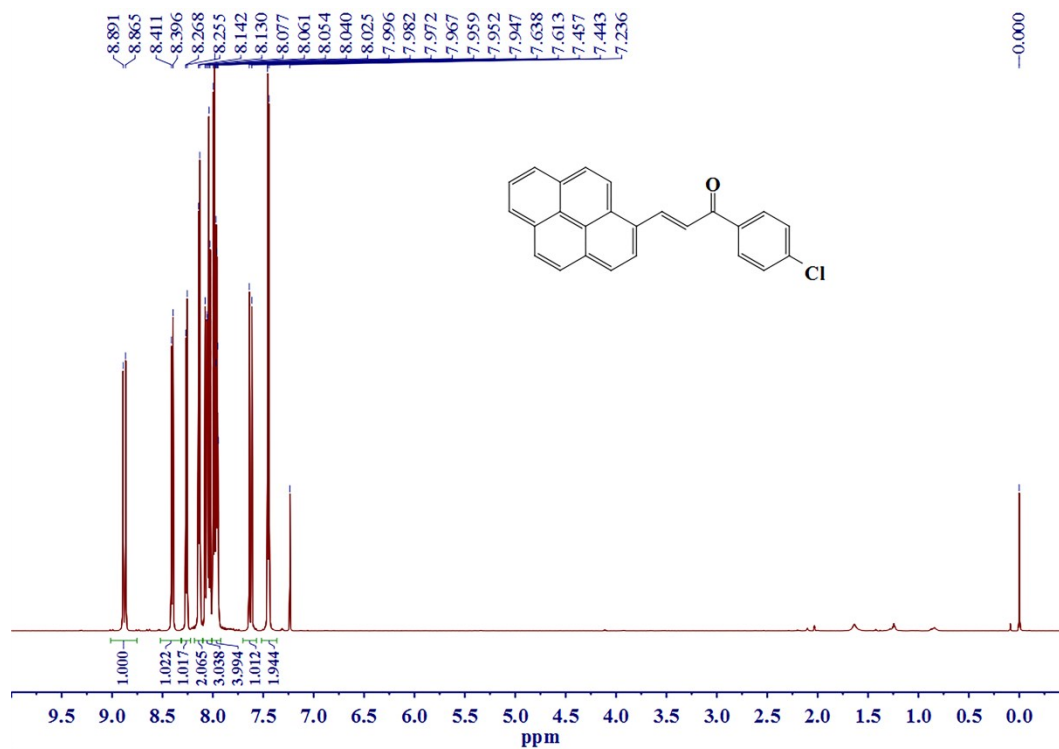

Fig. 65 <sup>1</sup>H NMR spectrum of PCPPO.

Assignments of each H in the NMR spectrum:  $\delta$ (ppm) 8.88 (Ar-H from pyrene ring, 1H), 8.40 (H of CH from 1-ethylene, 1H), 8.26

(Ar-H from pyrene ring, 1H), 8.14 (Ar-H from benzene ring, 2H), 8.09-7.93 (the rest Ar-H from pyrene ring, 7H), 7.63 (another H of CH from 1-ethylene, 1H), 7.45 (the rest Ar-H from benzene ring, 2H).

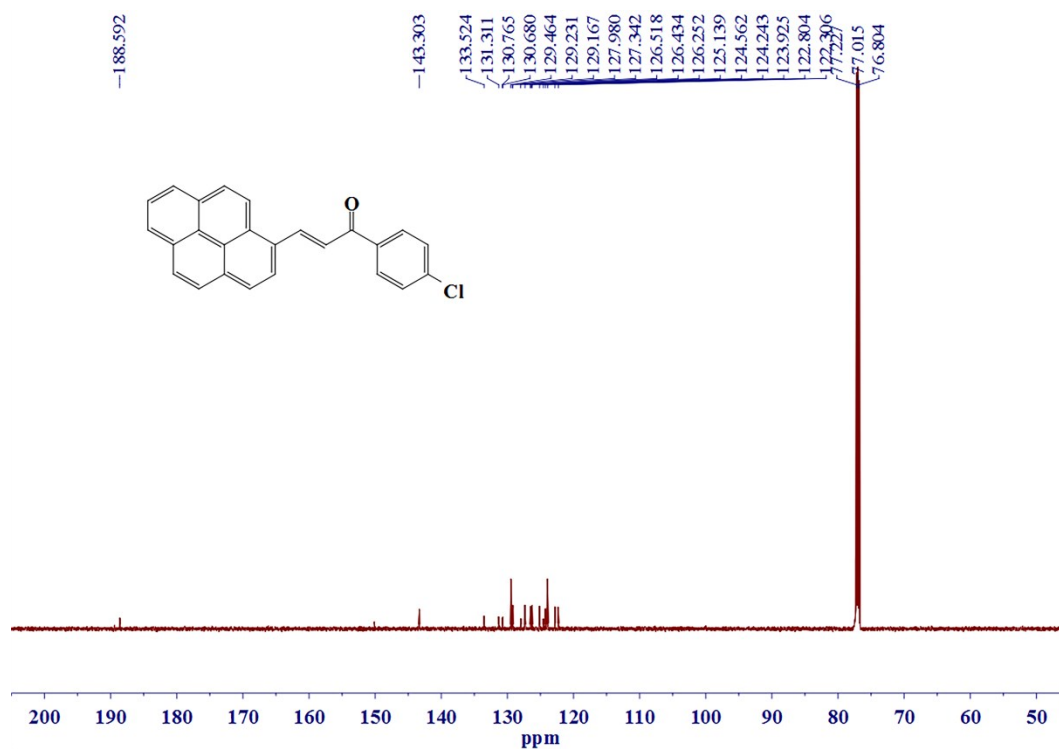

**Fig. 7S**  $^{13}\text{C}$  NMR spectrum of PCPPO.

Assignments of C in the NMR spectrum:  $\delta$  (ppm) 188.63 (C=O), 141.72(C\*= C-CO), 139.17 ((Ph)C-Cl), 136.60 (O=C-C\*(Ph)), 132.98-124.44, 122.95, 122.33 (the rest Ar-C from pyrene and benzene rings), 124.00 (C=C\*-CO)

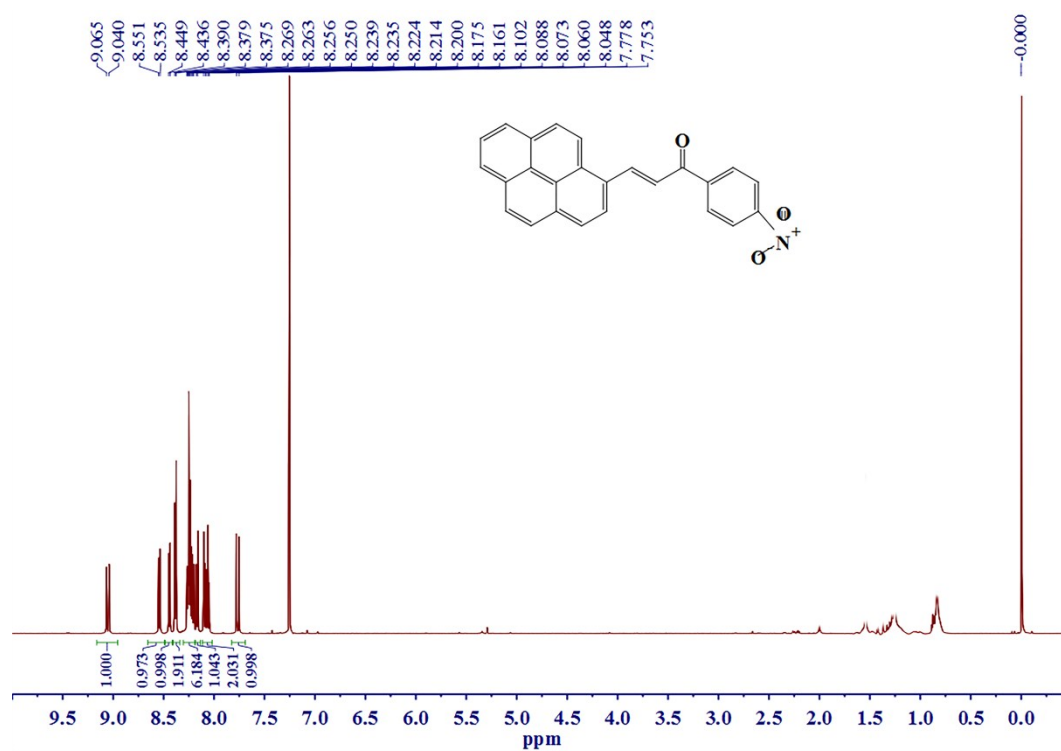

**Fig. 8S**  $^1\text{H}$  NMR spectrum of PNPPQ.

Assignments of each H in the NMR spectrum:  $\delta$ (ppm) 9.05 (Ar-H from benzene ring, 1H), 8.54 (Ar-H from pyrene ring, 1H), 8.44-8.33 (Ar-H from benzene ring, 1H), 8.33-8.19 (Ar-H from pyrene ring, 6H), 8.14-8.01 (Ar-H from pyrene ring, 2H), 8.17 (H of CH from 1-ethylene, 1H), 7.77 (another H of CH from 1-ethylene, 1H).

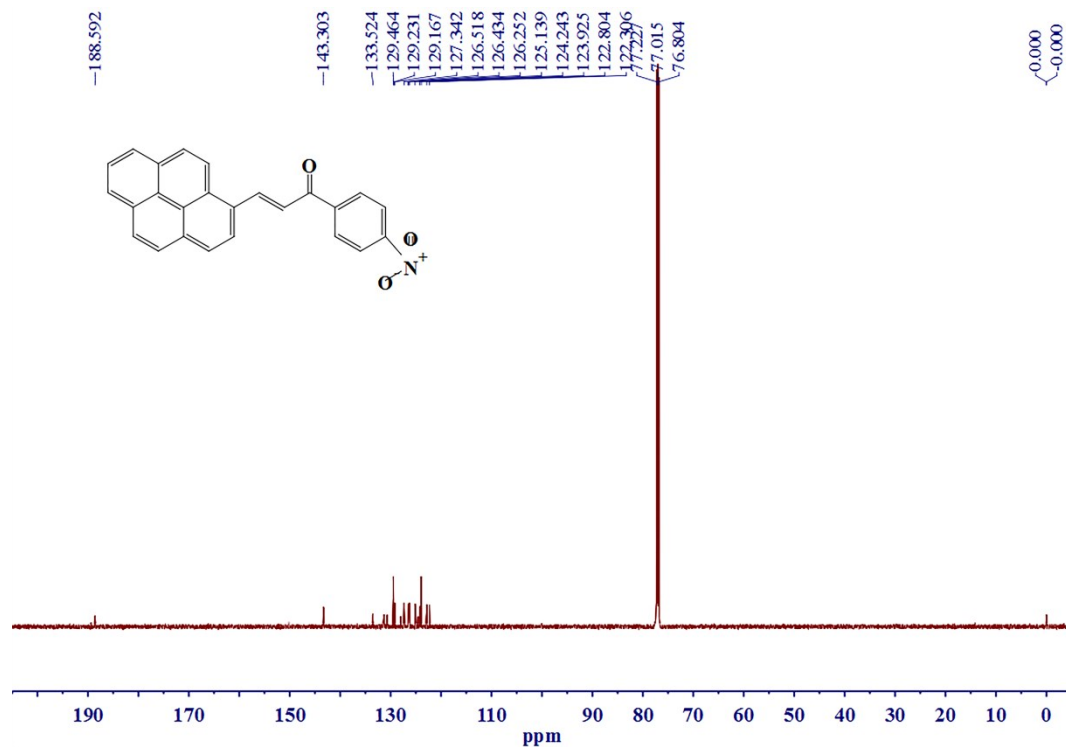

**Fig. 9S**  $^{13}\text{C}$  NMR spectrum of PNPPQ.

Assignments of C in the NMR spectrum:  $\delta$  (ppm) 188.59 ( $\text{C}=\text{O}$ ), 143.30 ( $(\text{Ph})\text{C}-\text{NO}_2$ ), 133.52 ( $\text{O}=\text{C}-\text{C}^*(\text{Ph})$ ), 131.31 ( $\text{C}^*=\text{C}-\text{CO}$ ), 130.77-124.24, 122.80, 122.31 (the rest Ar-C from pyrene and benzene rings), 123.92 ( $\text{C}=\text{C}^*-\text{CO}$ )

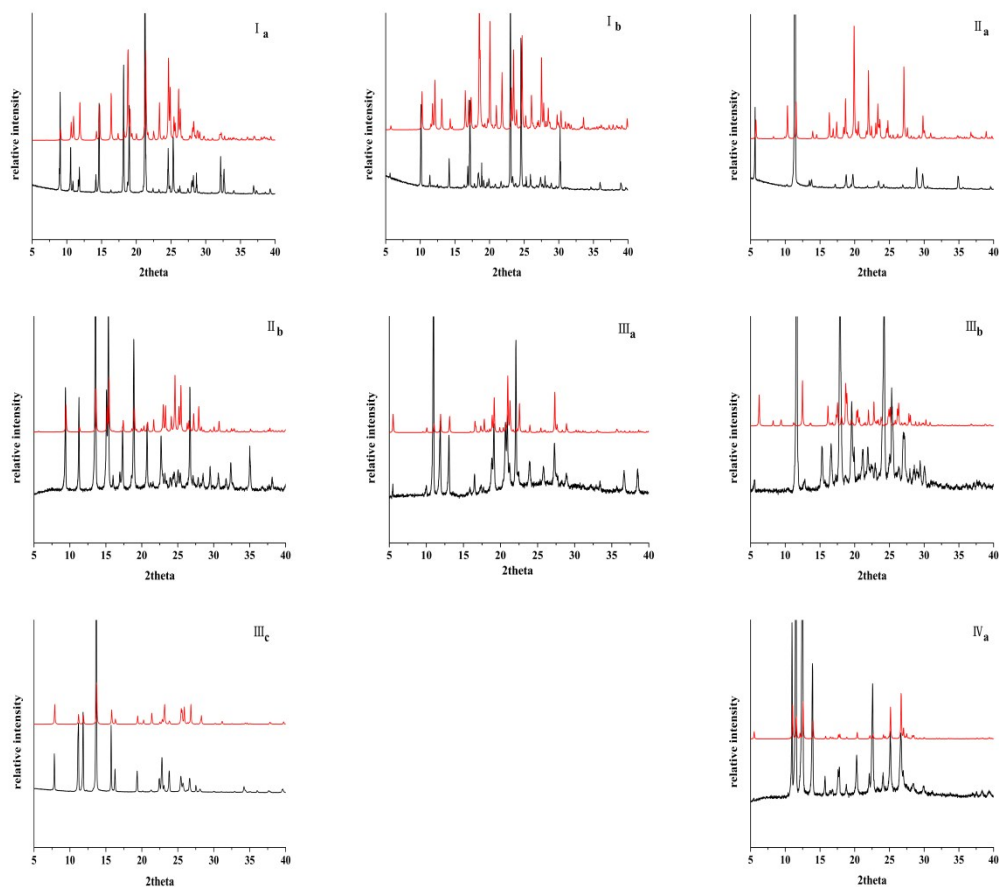

**Fig. 10S** Comparing of PXRD experimental patterns (black) of crystals with simulated patterns (red).

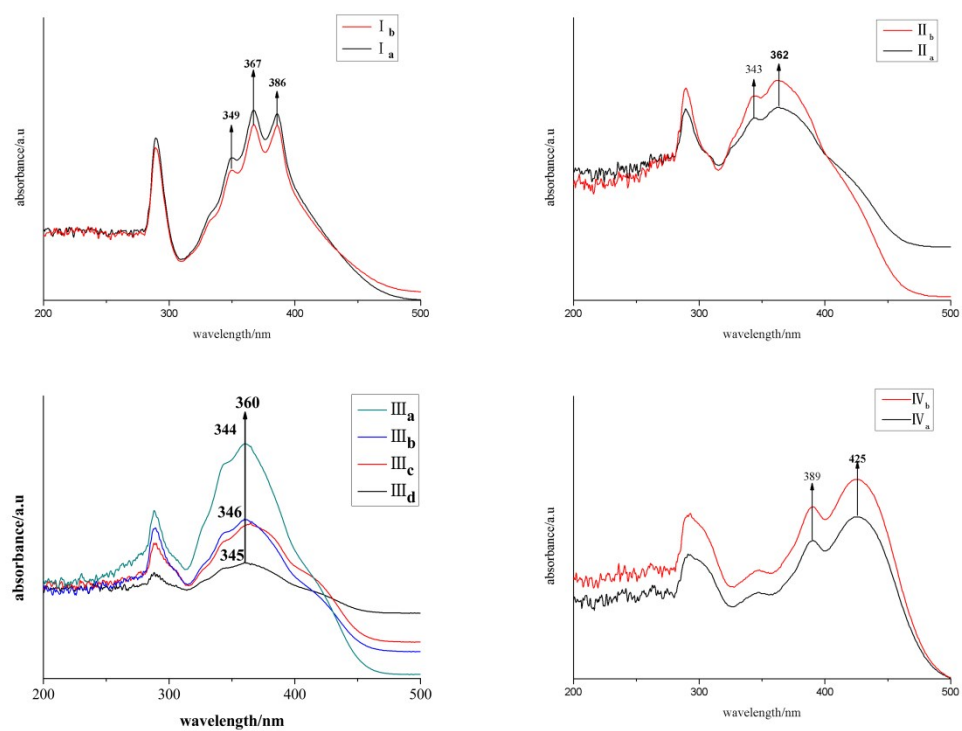

**Fig. 11S** Absorption spectra of crystals in acetonitrile solvent.

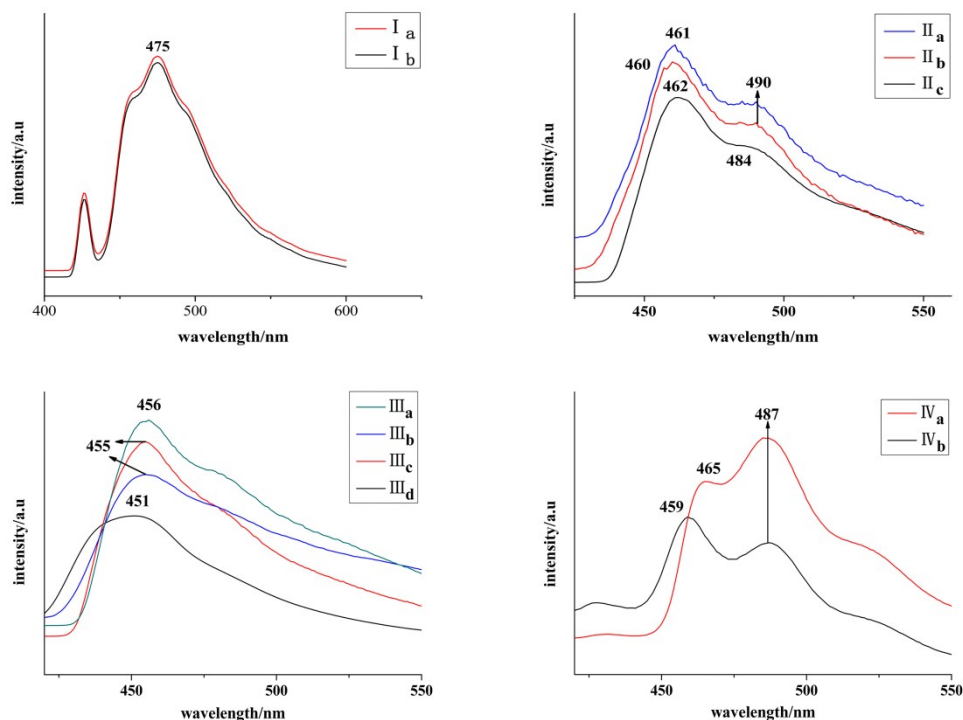

**Fig. 12S** Fluorescence spectra ( $\lambda_{\text{ex}} = 365$  nm) in cyclohexane solution for all forms.

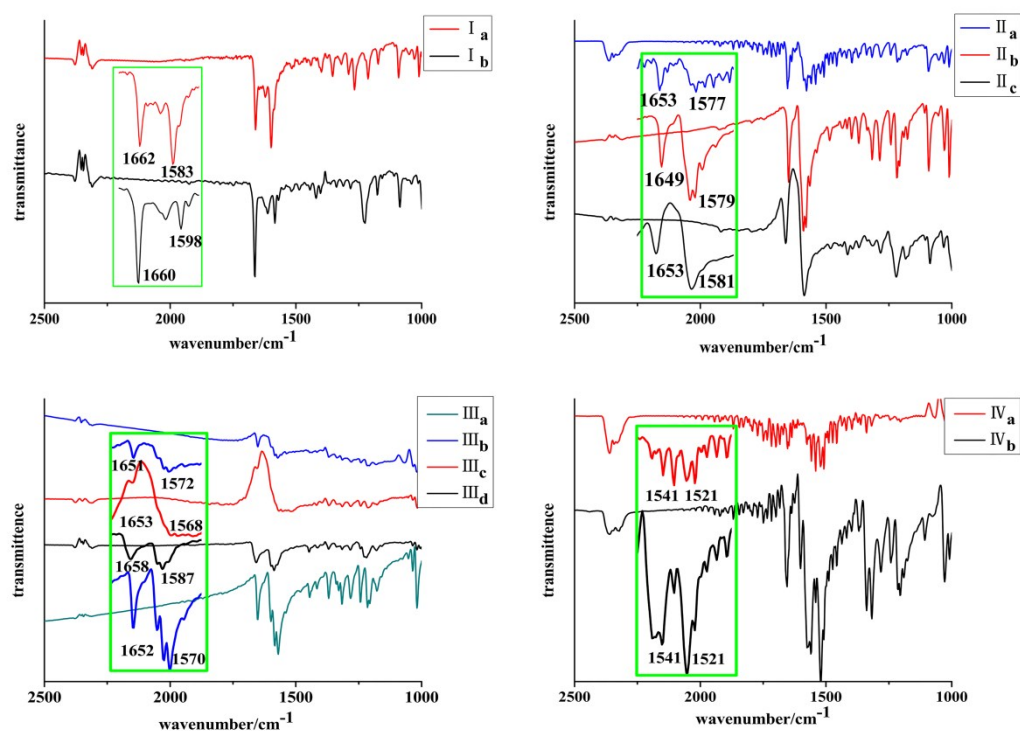

**Fig. 13S** IR spectra of crystals.



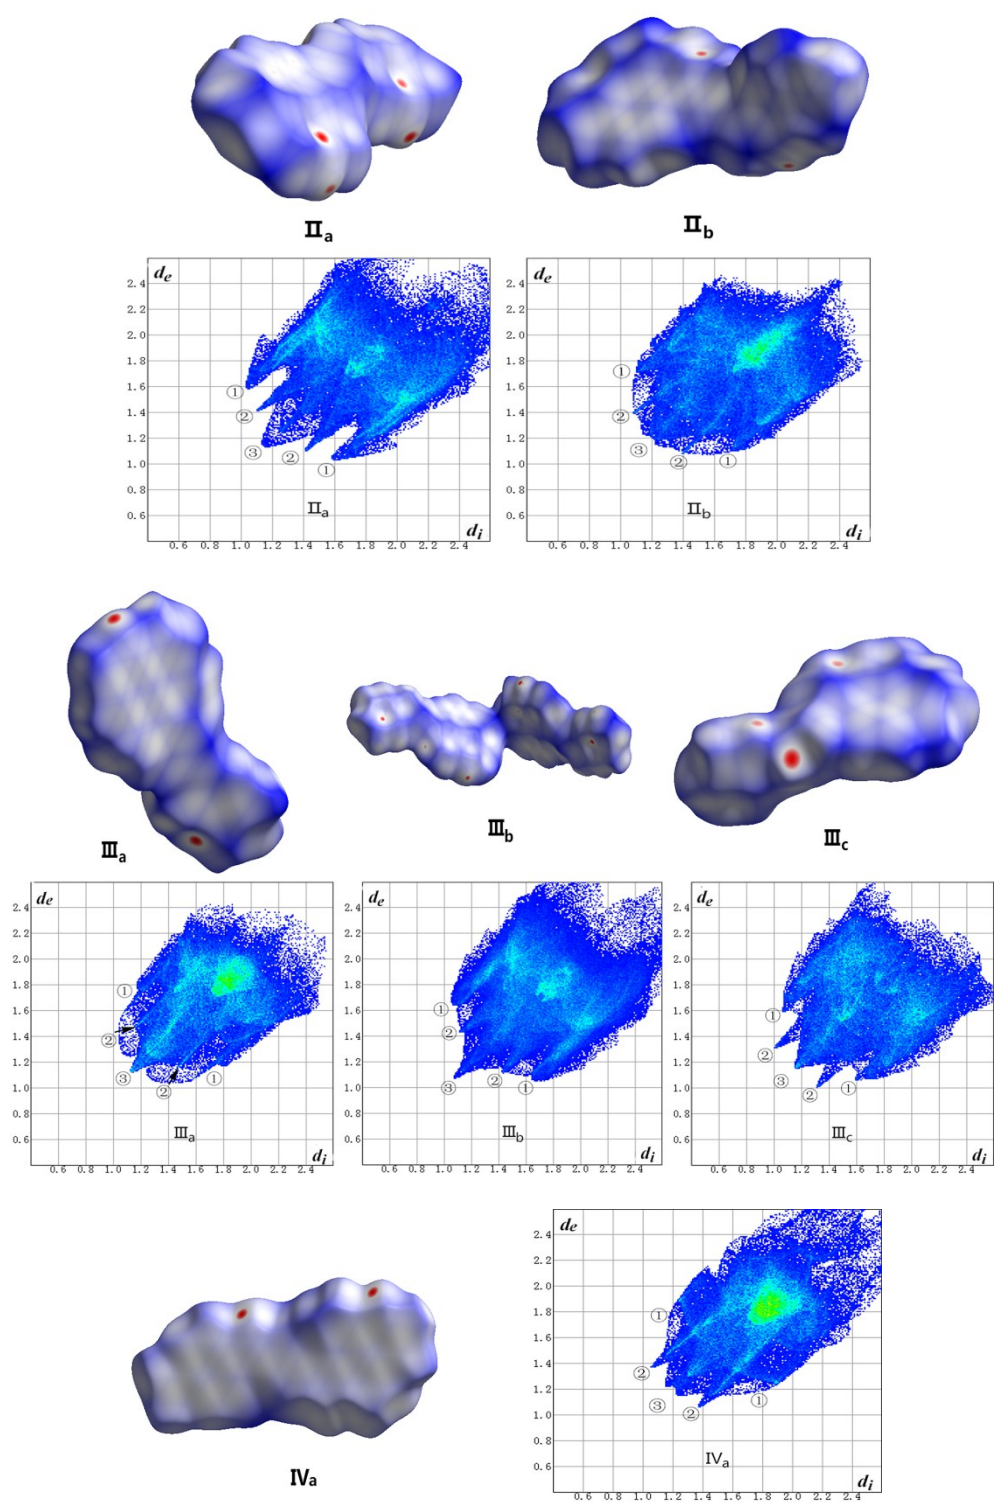

Fig. 14S Hirshfeld surface mapped with  $d_{\text{norm}}$  and Fingerprint plots of crystals

**Table. 1S** Solvents for crystal preparation.

| Chalcone               | <b>I</b>                      |                      | <b>II</b>                     |                                    |                       |
|------------------------|-------------------------------|----------------------|-------------------------------|------------------------------------|-----------------------|
| Form                   | <b>I<sub>a</sub></b>          | <b>I<sub>b</sub></b> | <b>II<sub>a</sub></b>         | <b>II<sub>b</sub></b>              | <b>II<sub>c</sub></b> |
| Solvent <sup>[a]</sup> | Acetic acid/ ethyl<br>acetate | Ethanol              | Acetic acid/ ethyl<br>acetate | Ethyl acetate /<br>dichloromethane | Isopropanol           |

| Chalcone               | <b>III</b>                |                           |                            |                        | <b>IV</b>                        |                                  |
|------------------------|---------------------------|---------------------------|----------------------------|------------------------|----------------------------------|----------------------------------|
| Form                   | <b>III<sub>a</sub></b>    | <b>III<sub>b</sub></b>    | <b>III<sub>c</sub></b>     | <b>III<sub>d</sub></b> | <b>IV<sub>a</sub></b>            | <b>IV<sub>b</sub></b>            |
| Solvent <sup>[a]</sup> | Ethanol/ ethyl<br>acetate | Ethanol/ ethyl<br>acetate | Actonitrile/<br>chloroform | Isopropanol            | Acetonitrile<br>/dichloromethane | Acetonitrile<br>/dichloromethane |

[a] The volume ratio of mixed solvents above was v:v = 1:1.

**Table. 2S** Melting point, enthalpy and decomposition temperature range of all crystals

| Chalcone                        | <b>I</b>             |                      | <b>II</b>             |                       |                       |
|---------------------------------|----------------------|----------------------|-----------------------|-----------------------|-----------------------|
| Form                            | <b>I<sub>a</sub></b> | <b>I<sub>b</sub></b> | <b>II<sub>a</sub></b> | <b>II<sub>b</sub></b> | <b>II<sub>c</sub></b> |
| Melting point/°C                | 137                  | 144                  | 144,156               | 162                   | 118,131               |
| Enthalpy/J·g <sup>-1</sup>      | 71.49                | 108.88               | 61.18                 | 76.12                 | 33.62                 |
| Decomposition<br>temperature/°C | 200-360              | 250-360              | 270-450               | 310-450               | 210-450               |

| Chalone                         | III              |                  |                  |                  | IV              |                 |
|---------------------------------|------------------|------------------|------------------|------------------|-----------------|-----------------|
| Form                            | III <sub>a</sub> | III <sub>b</sub> | III <sub>c</sub> | III <sub>d</sub> | IV <sub>a</sub> | IV <sub>b</sub> |
| Melting point/°C                | 120              | 160              | 165              | 156              | 215.5           | 215.8           |
| Ethalpy/J·g <sup>-1</sup>       | 57.20            | 71.67            | 45.45            | 67.26            | 76.94           | 68.8            |
| Decomposition<br>temperature/°C | 230-440          | 280-450          | 230-450          | 230-370          | 290-500         | 250-500         |

**Table. 3S** The maximum absorption and emission peak of all solids

| Forms                                        | I <sub>a</sub> | I <sub>b</sub> | II <sub>a</sub> | II <sub>b</sub> | II <sub>c</sub> | III <sub>a</sub> | III <sub>b</sub> | III <sub>c</sub> | III <sub>d</sub> | IV <sub>a</sub> | IV <sub>b</sub> |
|----------------------------------------------|----------------|----------------|-----------------|-----------------|-----------------|------------------|------------------|------------------|------------------|-----------------|-----------------|
| $\lambda_{\text{max}}^{\text{ab}}/\text{nm}$ | 417            | 492            | 461             | 453             | 442             | 453              | 461              | 486              | 451              | 479             | 518             |
| $\lambda_{\text{max}}^{\text{em}}/\text{nm}$ | 548            | /              | 618             | 578             | 611             | /                | 662              | 551              | 547              | 611             | /               |

**Table. 4S** Contributions of individual intermolecular interactions to the Hirshfeld surface of all crystals

| Polymorph        | C-H   | H-H   | O-H   | C-C   |
|------------------|-------|-------|-------|-------|
| I <sub>a</sub>   | 33.8% | 36.9% | 7.6%  | 6.0%  |
| I <sub>b</sub>   | 35.7% | 35.6% | 9.3%  | 3.6%  |
| II <sub>a</sub>  | 42.5% | 28.1% | 7.3%  | 6.2%  |
| II <sub>b</sub>  | 26.4% | 39.2% | 7.8%  | 12.8% |
| III <sub>a</sub> | 41.4% | 47.3% | 7.4%  | 3.2%  |
| III <sub>b</sub> | 39.6% | 44.7% | 8.1%  | 6.6%  |
| III <sub>c</sub> | 26.8% | 49.1% | 8.4%  | 15.7% |
| IV <sub>a</sub>  | 16.4% | 35.8% | 24.7% | 17.3% |
